# Supplementary material
Source: PubMed Central journal article supplement (PMC5648868)
Supplement: JB.00260-17_zjb999094569s8.pdf [file JB.00260-17_zjb999094569s8.pdf]

**Table S8**

Details of bacterial strains, plasmids and oligo's used during this study

| Strain / Plasmid             | Relevant Characteristics                                                                                            | Reference / source |
|------------------------------|---------------------------------------------------------------------------------------------------------------------|--------------------|
| <b><i>E. coli</i></b>        |                                                                                                                     |                    |
| CC118 $\lambda$ -pir         | $\Delta(ara, leu)7697 araD139 \Delta lacX74 galE galK phoA20 thi-1 rpsE rpoB(RfR) argE(am) recA1 \lambda pir^+$     | (1)                |
| DH5 $\alpha$                 | $F^- \phi 80 dlacZ \Delta M15 \Delta(lacZYA-argF)U169 recA1 hsdRI7 (r_k m^+_k) supE44 \lambda^- thi-1 relA1 gyrA96$ | (2)                |
| SM10 $\lambda$ -pir          | $thi thr leu tonA lacY supE recA::RP4-2-Tc::Mu Km \lambda pir$                                                      | (3)                |
| <b><i>B. cenocepacia</i></b> |                                                                                                                     |                    |
| <i>B. cenocepacia</i> H111   | Clinical isolate from CF patient. Hanover Germany                                                                   | (4)                |
| <i>B. cenocepacia</i> J2315  | Clinical isolate from CF patient. Edinburgh United Kingdom                                                          | (5)                |
| <b>Plasmid</b>               |                                                                                                                     |                    |
| pSC200                       | <i>PrhaB</i> (rhamnose-inducible), Tp <sup>R</sup>                                                                  | (6)                |
| pRK2013                      | ori <sub>colE1</sub> , RK2 derivative, mob <sup>+</sup> tra <sup>+</sup> , Km <sup>R</sup>                          | (7)                |
| pLG99                        | Transposon T23 (IS <sub>lacZ</sub> -P <sub>rhaB</sub> out-/FRT) Tp <sup>R</sup>                                     | (8)                |
| pSC200-BCAM0545              | pSC200 derivative to create BCAM0545 conditional mutant                                                             | This study         |
| pSC200-BCAM0632              | pSC200 derivative to create BCAM0632 conditional mutant                                                             | This study         |
| pSC200-BCAM0746              | pSC200 derivative to create BCAM0746 conditional mutant                                                             | This study         |
| pSC200-BCAM0855              | pSC200 derivative to create BCAM0855 conditional mutant                                                             | This study         |
| pSC200-BCAM0911              | pSC200 derivative to create BCAM0911 conditional mutant                                                             | This study         |
| pSC200-BCAM0913              | pSC200 derivative to create BCAM0913 conditional mutant                                                             | This study         |
| pSC200-BCAM0918              | pSC200 derivative to create BCAM0918 conditional mutant                                                             | This study         |
| pSC200-BCAM0963              | pSC200 derivative to create BCAM0963 conditional mutant                                                             | This study         |
| pSC200-BCAM0965              | pSC200 derivative to create BCAM0965 conditional mutant                                                             | This study         |
| pSC200-BCAM0967              | pSC200 derivative to create BCAM0967 conditional mutant                                                             | This study         |
| pSC200-BCAM0972              | pSC200 derivative to create BCAM0972 conditional mutant                                                             | This study         |
| pSC200-BCAM0986              | pSC200 derivative to create BCAM0986 conditional mutant                                                             | This study         |
| pSC200-BCAM0994              | pSC200 derivative to create BCAM0994 conditional mutant                                                             | This study         |
| pSC200-BCAM0995              | pSC200 derivative to create BCAM0995 conditional mutant                                                             | This study         |
| pSC200-BCAM0998              | pSC200 derivative to create BCAM0998 conditional mutant                                                             | This study         |

|                  |                                                          |            |
|------------------|----------------------------------------------------------|------------|
| pSC200-BCAM1362  | pSC200 derivative to create BCAM1362 conditional mutant  | This study |
| pSC200-BCAM1812  | pSC200 derivative to create BCAM1812 conditional mutant  | This study |
| pSC200-BCAM1931  | pSC200 derivative to create BCAM1931 conditional mutant  | This study |
| pSC200-BCAM2321  | pSC200 derivative to create BCAM2321 conditional mutant  | This study |
| pSC200-BCAM2358A | pSC200 derivative to create BCAM2358A conditional mutant | This study |
| pSC200-BCAM2650  | pSC200 derivative to create BCAM2650 conditional mutant  | This study |
| pSC200-BCAM2688  | pSC200 derivative to create BCAM2688 conditional mutant  | This study |
| pSC200-BCAM2833  | pSC200 derivative to create BCAM2833 conditional mutant  | This study |

**Table S9**

Details of oligo's and the sequence of each oligo used during this study.

| Oligonucleotide                             | Sequence                                                                      |
|---------------------------------------------|-------------------------------------------------------------------------------|
| <b>Illumina Tn-Seq adapters</b>             |                                                                               |
| PAIR_ADAPT_6BC##_HI                         | ACACTCTTTCCCTACACGACGCTCTTCCGATCTBBBBBBT                                      |
| PAIR_ADAPT_6BC##_LO_5PH                     | <5' phos>BBBBBBAGATCGGAAGAGCGGTTCAGCAGGAATGCCGAG                              |
| <b>Tn-Seq circle method collector probe</b> |                                                                               |
| T23_PAIR_COLLECT_1                          | CTTCGGCGCGCCCTAGGGGATCCTCGGCATTCTGCTGAACCGCTCTTCCGATCT                        |
| <b>Tn-Seq amplification primers</b>         |                                                                               |
| T23_SLXA_PAIR_AmpF_3                        | AATGATACGGCGACCACCGAGATCTACACTAGAGAATAGGAACTTCGGAATAGGAACTTCTTAGATGTGTATAAGAG |
| SLXA_PAIR_REV_AMP                           | CAAGCAGAAGACGGCATAACGAGATCGGTCTCGGCATTCTGCTGAACCGCTCTTCCGATCT                 |
| <b>Tn-Seq Sequencing primers</b>            |                                                                               |
| T23_SEQ_G                                   | AATAGGAACTTCGGAATAGGAACTTCTTAGATGTGTATAAGAGACAG                               |
| T23_INDEX_1                                 | CTAGAGAATAGGAACTTCGGAATAGGAACTTCTTAGATGTGTATAAG                               |
| PE_READ2_SEQ                                | CGGTCTCGGCATTCTGCTGAACCGCTCTTCCGATCT                                          |
| <b>pSC200 conditional mutant primers</b>    |                                                                               |
| BCAM0545 FW (NdeI)                          | TAT <u>CATATG</u> CAAACGCATCAGGCCGCC                                          |
| BCAM0545 Rv (XbaI)                          | TAT <u>TCTAGA</u> TCAAACAGTGCGTTGCATGAG                                       |
| BCAM0746 FW (NdeI)                          | TAT <u>CATATG</u> AGCACGATTCTCGAAAGC                                          |
| BCAM0746 Rv (XbaI)                          | TAT <u>TCTAGA</u> CGGCCTGGTTCATGAATT                                          |

BCAM0855 FW (NdeI) TATCATATGAATCTGACTATCATCGGCAGC  
BCAM0855 Rv (XbaI) TATTCTAGAGCGCTTCGCGAGCTCCTC  
BCAM0911 FW (NdeI) TATCATATGTACGACTTGCTGAAAACCATC  
BCAM0911 Rv (XbaI) TATTCTAGAACATGTCGTTGTCGTTGAG  
BCAM0913 FW (NdeI) TATCATATGCTCGTTCTCGGCATCGAAA  
BCAM0913 Rv (XbaI) TATTCTAGAGAGCTTCGATACTTCCGGG  
BCAM0918 FW (NdeI) TATCATATGACCAAAAAGCTGAACGAAGTAT  
BCAM0918 Rv (XbaI) TATTCTAGAATCTCGCGCATGTACATC  
BCAM0963 FW (NdeI) TATCATATGAAGAAACTCCTGATCGCTACC  
BCAM0963 Rv (XbaI) TATTCTAGAGCTTCAGCTCGTTTCGAC  
BCAM0967 FW (NdeI) TATCATATGCCGCTGGCGCGCATATTGT  
BCAM0967 Rv (XbaI) TATTCTAGAGCGTGGTAGAAGAGGGAAAG  
BCAM0972 FW (NdeI) TATCATATGACTCCGTCTGATGTTAAAGCC  
BCAM0972 Rv (XbaI) TATTCTAGAACCTTGTACTCTTCGCACG  
BCAM0986 FW (NdeI) TATCATATGGTTCGGCAGCGTCCTGATG  
BCAM0986 Rv (XbaI) TATTCTAGACTCCTGCACCGAACCAT  
BCAM0994 FW (NdeI) TATCATATGAGCTGGCTCGACAACTGTT  
BCAM0994 Rv (XbaI) TATTCTAGACCATCTGCATCAGCGACA  
BCAM0995 FW (NdeI) TATCATATGAGCACTTTTCCCCTCTCGA  
BCAM0995 Rv (XbaI) TATTCTAGAAATTCGGTATGGTCGATGT  
BCAM1362 FW (NdeI) TATCATATGAGCGTAAAAAGAAGACCCAC  
BCAM1362 Rv (XbaI) TATTCTAGACCGCTTGAGCAGCACGAAC  
BCAM1812 FW (NdeI) TATCATATGACCGAACTTCTTCACGGCGA  
BCAM1812 Rv (XbaI) TATTCTAGACTGGCCGTAGCGCTCCG  
BCAM1931 FW (NdeI) TATCATATGAAACAAGACTCTGATCGTTGCA  
BCAM1931 Rv (XbaI) TATTCTAGACGCGACATCACCGTTCGTG  
BCAM2321 FW (NdeI) TATCATATGAATACGATCAAACGAATCGATC  
BCAM2321 Rv (XbaI) TATTCTAGACGCGTTGTCGGGCACGAA  
BCAM2358A FW (NdeI) TATCATATGTCGACCCACATCTGTTTCGC  
BCAM2358A Rv (XbaI) TATTCTAGACGCGCGCGGGCCGAGG  
BCAM2650 FW (NdeI) TATCATATGATCATCAAACCGCGCGT

BCAM2650 Rv (XbaI)

TATTCTAGAGTGCCGTCGATCTCTTCCT

BCAM2688 FW (NdeI)

TATCATATGGCCCGTTTCCCATTCCGT

BCAM2688 Rv (XbaI)

TATTCTAGAAGGATGTTTCGTCAGTTGCAG

## Strain references

1. Herrero M, de Lorenzo V, Timmis KN. 1990. Transposon vectors containing non-antibiotic resistance selection markers for cloning and stable chromosomal insertion of foreign genes in gram-negative bacteria. *J Bacteriol* 172:6557-67.
2. Hanahan D. 1983. Studies on transformation of *Escherichia coli* with plasmids. *J Mol Biol* 166:557-80.
3. Simon R, Priefer U, Puhler A. 1983. A Broad Host Range Mobilization System for In Vivo Genetic Engineering: Transposon Mutagenesis in Gram Negative Bacteria. *Nat Biotech* 1:784-791.
4. Romling U, Fiedler B, Bosshammer J, Grothues D, Greipel J, von der Hardt H, Tummler B. 1994. Epidemiology of chronic *Pseudomonas aeruginosa* infections in cystic fibrosis. *J Infect Dis* 170:1616-21.
5. Govan JR, Brown PH, Maddison J, Doherty CJ, Nelson JW, Dodd M, Greening AP, Webb AK. 1993. Evidence for transmission of *Pseudomonas cepacia* by social contact in cystic fibrosis. *Lancet* 342:15-9.
6. Ortega XP, Cardona ST, Brown AR, Loutet SA, Flannagan RS, Campopiano DJ, Govan JR, Valvano MA. 2007. A putative gene cluster for aminoarabinose biosynthesis is essential for *Burkholderia cenocepacia* viability. *J Bacteriol* 189:3639-44.
7. Figurski DH, Helinski DR. 1979. Replication of an origin-containing derivative of plasmid RK2 dependent on a plasmid function provided in trans. *Proc Natl Acad Sci U S A* 76:1648-52.
8. Gallagher LA, Ramage E, Patrapuvich R, Weiss E, Brittnacher M, Manoel C. 2013. Sequence-Defined transposon mutant library of *Burkholderia thailandensis*. *mBio* 4.
