# Supplementary material
Source: PubMed Central journal article supplement (PMC5648868)
Supplement: JB.00260-17_zjb999094569s9.pdf [file JB.00260-17_zjb999094569s9.pdf]

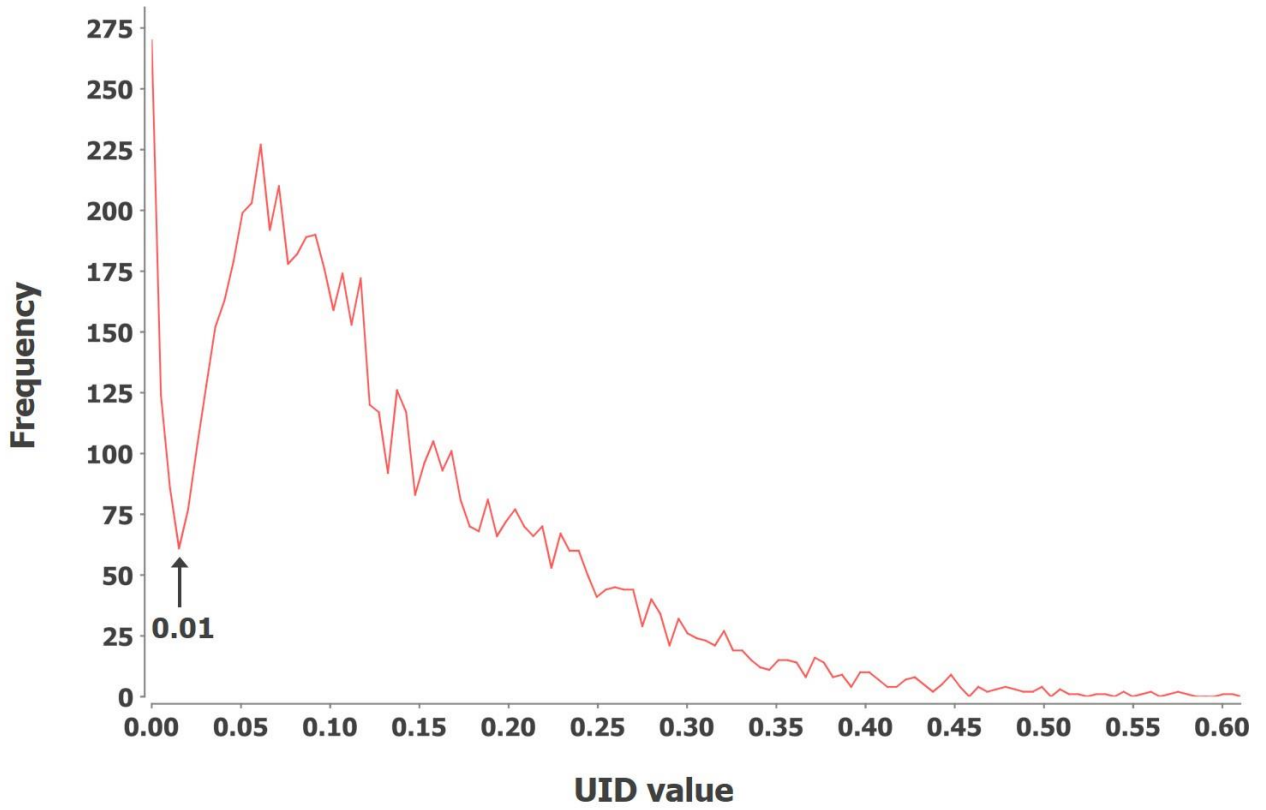

**Fig. S10.**

Plot of UID values and the frequency which they appear. A bimodal distribution was observed where the essential genes are found at the far left of the plot and a cut-off for essentiality estimated at UID 0.01. This figure was produced by the Tn-Seq explorer software.
