# Supplementary material
Source: PubMed Central journal article supplement (PMC5648868)
Supplement: JB.00260-17_zjb999094569s10.pdf [file JB.00260-17_zjb999094569s10.pdf]

## Supplementary information

**Table S1** – List of genes identified as essential in LB rich medium, essential intergenic regions and the raw data.

**Table S2** – Comparison of *B. cenocepacia* J2315 essential genes identified by Wong et al. (2016) with essential genes identified in H111. Common essential genes and H111 specific genes are also shown.

**Table S3** – Essential genes data from Bloodworth et al., (2013) compared with the LB rich medium Tn-Seq dataset.

**Table S4** – Details of the genes identified as essential in ABC minimal medium, genes specific for ABC medium in comparison to LB, essential intergenic regions and the raw data.

**Table S5** – Comparison of genes identified by Schwager et al., 2013 as unable to grow in ABC media with essential genes identified using Tn-Seq

**Table S6** – List of genes identified as essential in LB rich medium cultured under 0.5% O<sub>2</sub> conditions. Genes specific for 0.5% O<sub>2</sub> in comparison to LB, essential intergenic regions and the raw data.

**Table S7** – Details of the core essential genome of *B. cenocepacia* H111 and a functional breakdown of those genes.

**Table S8** – List of bacterial strains and plasmids.

**Table S9** – List of primers used in this study.

**Figure S10** – Calculation of UIDs and determination of cut-off values.
